# Supplementary material for: Spatially resolved transcriptomics reveals the architecture of the tumor-microenvironment interface
Source: PubMed Central journal article supplement (PMC8560802; doi:10.1038/s41467-021-26614-z), 2021-11-01
Supplement: 41467_2021_26614_MOESM1_ESM.pdf [file 41467_2021_26614_MOESM1_ESM.pdf]

## **Supplementary Information**

### **Spatially resolved transcriptomics reveals the architecture of the tumor-microenvironment interface**

Miranda V. Hunter, Reuben Moncada, Joshua M. Weiss, Itai Yanai, Richard M. White

#### Contents:

Supplementary Figures 1-14

Supplementary Tables 1-3

**Supplementary Figure 1. Spatially resolved transcriptomics data statistics.**

**a-b.** Violin plots showing number of transcripts (UMIs) detected per Visium array spot (a) and number of unique genes detected per spot (b). **c.** Images of the H&E stained tissue sections used for SRT. Scale bar, 2 mm. **d-e.** Numbers of UMIs and genes detected per spot, plotted onto the tissue array. **f.** Violin plot showing the number of UMIs per spot across the tissue types in the individual SRT samples. **g.** Approximation of the number of nuclei per Visium array spot (55  $\mu\text{m}$  diameter) in the tumor and muscle regions ( $n = 10$  images quantified for each).

# Supplementary Figure 1

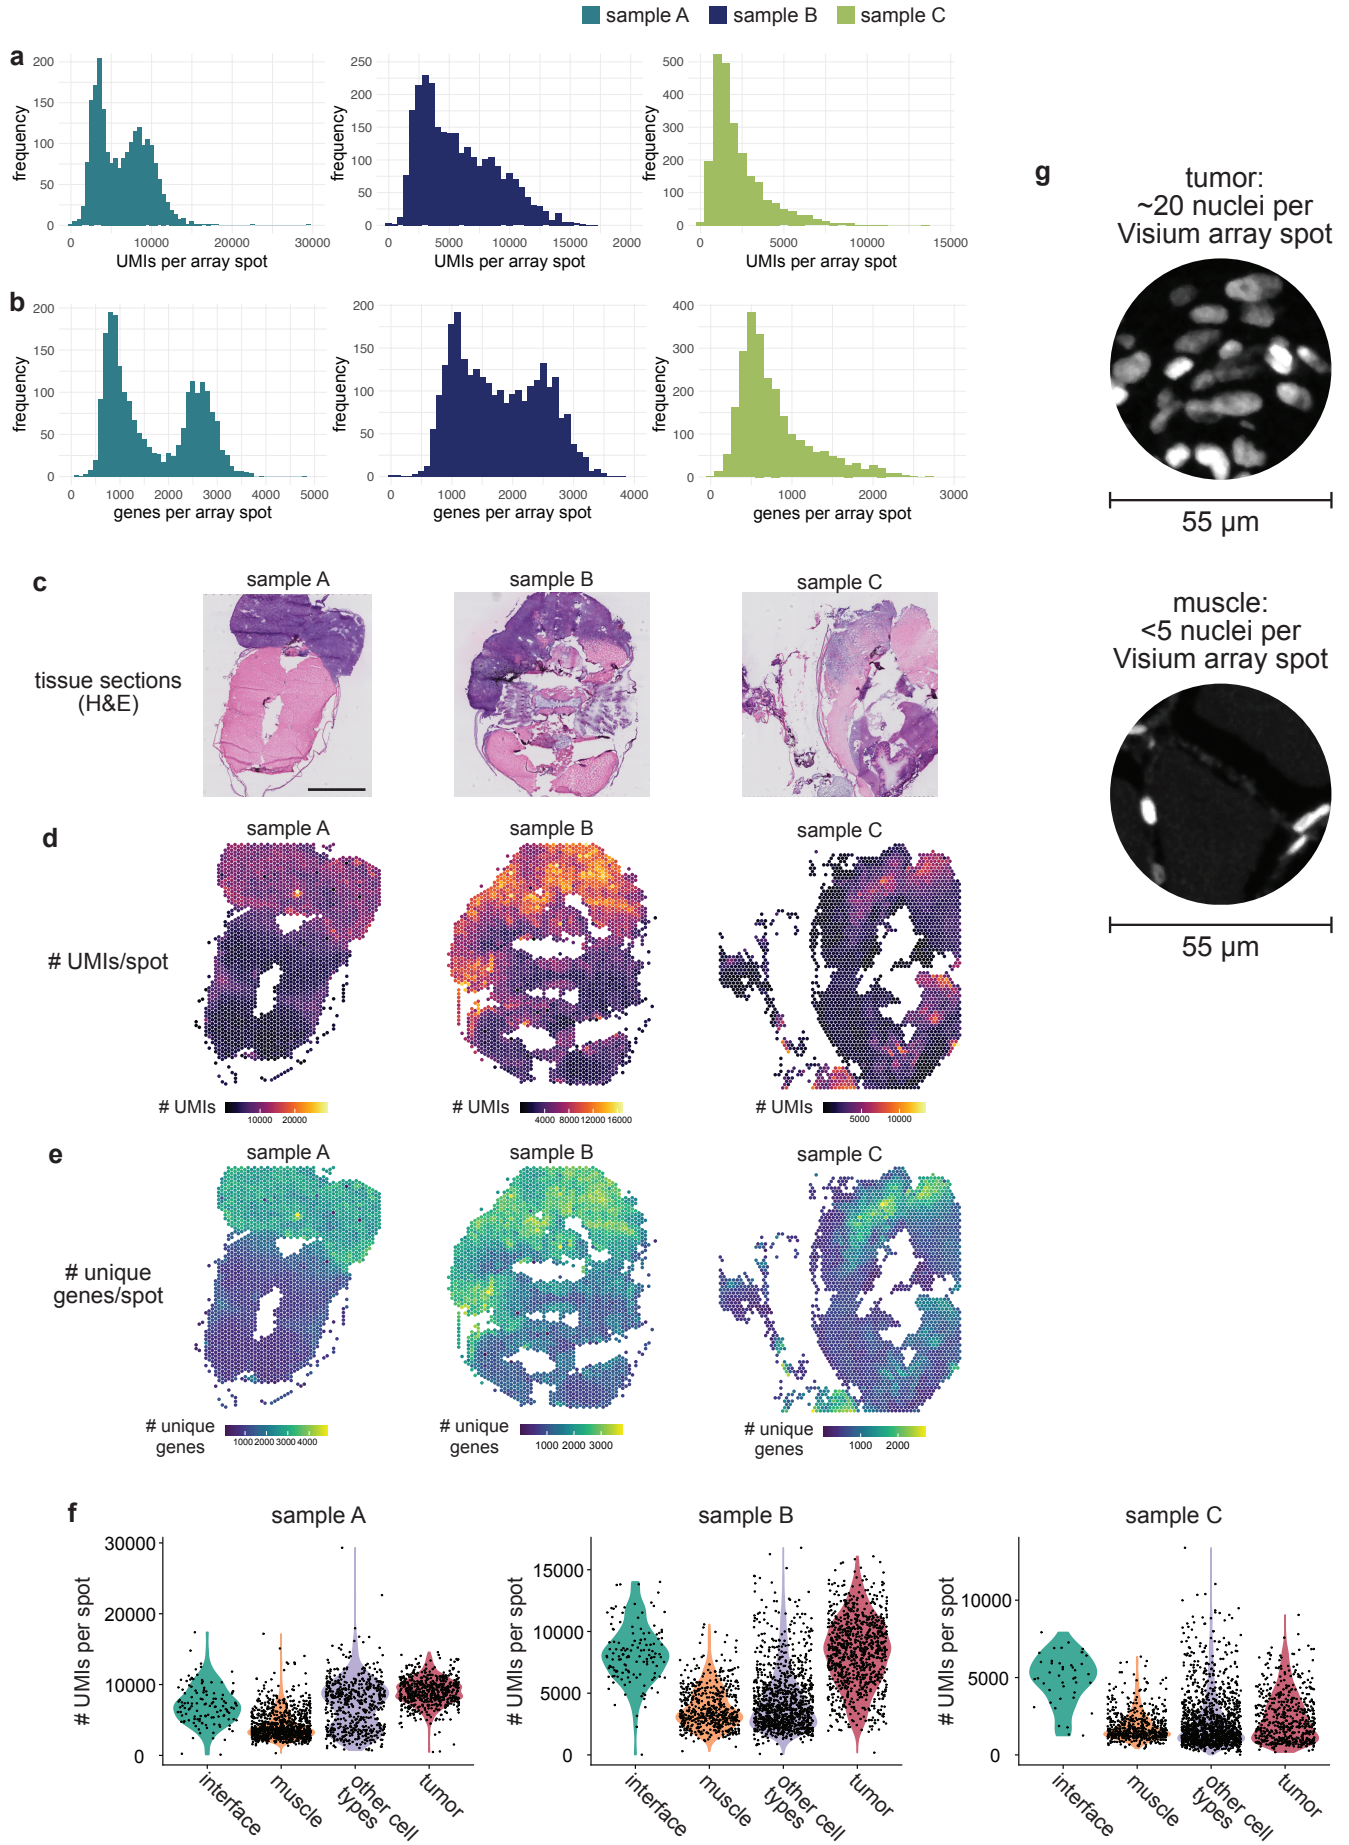

## Supplementary Figure 2

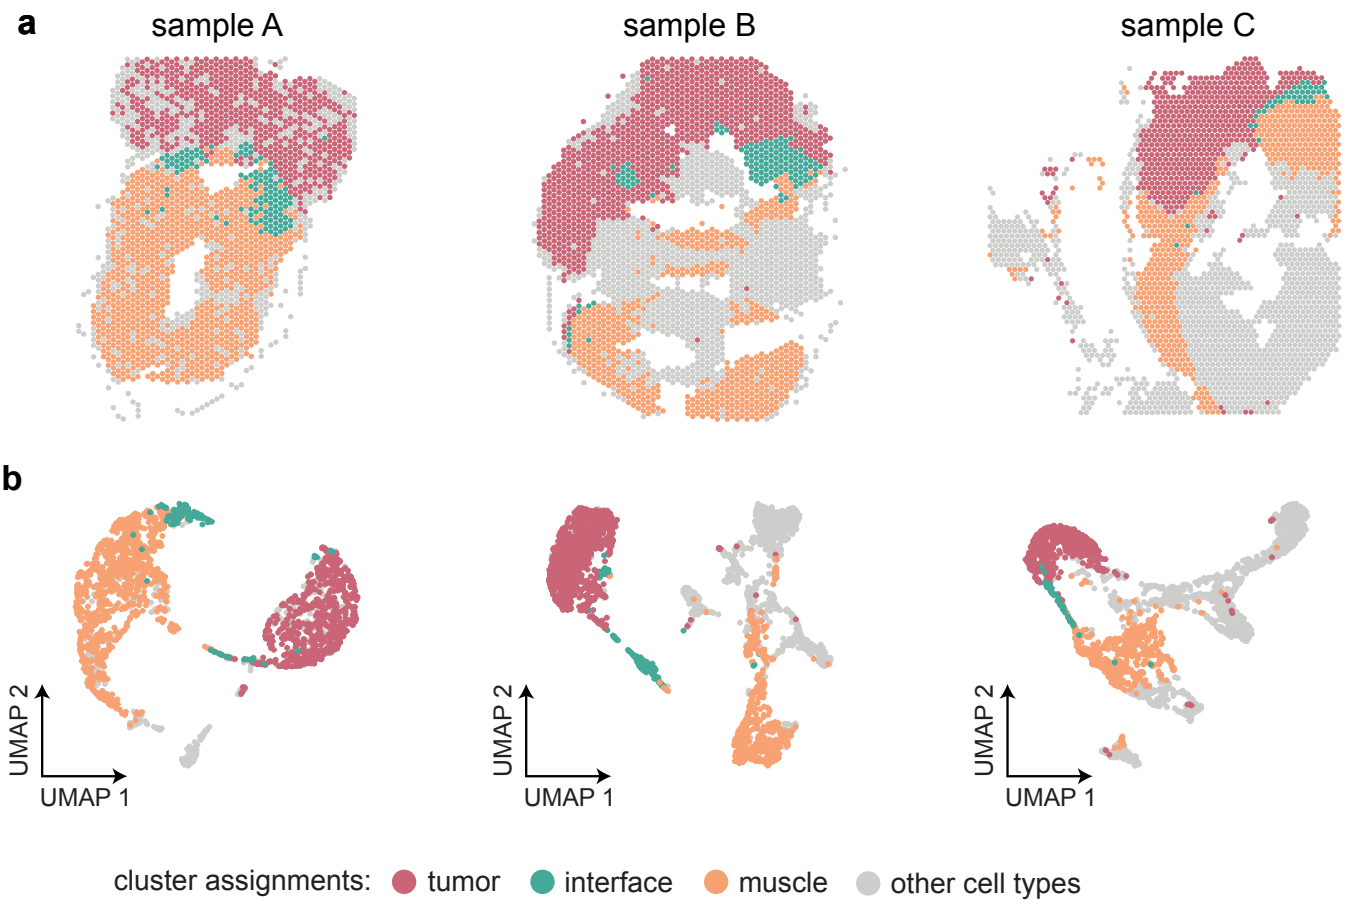

### Supplementary Figure 2. A unique interface cluster is found in each SRT sample.

a. Cluster assignments plotted onto the Visium array for individual samples. b. Cluster assignments labelled in UMAP space for individual samples.

## Supplementary Figure 3

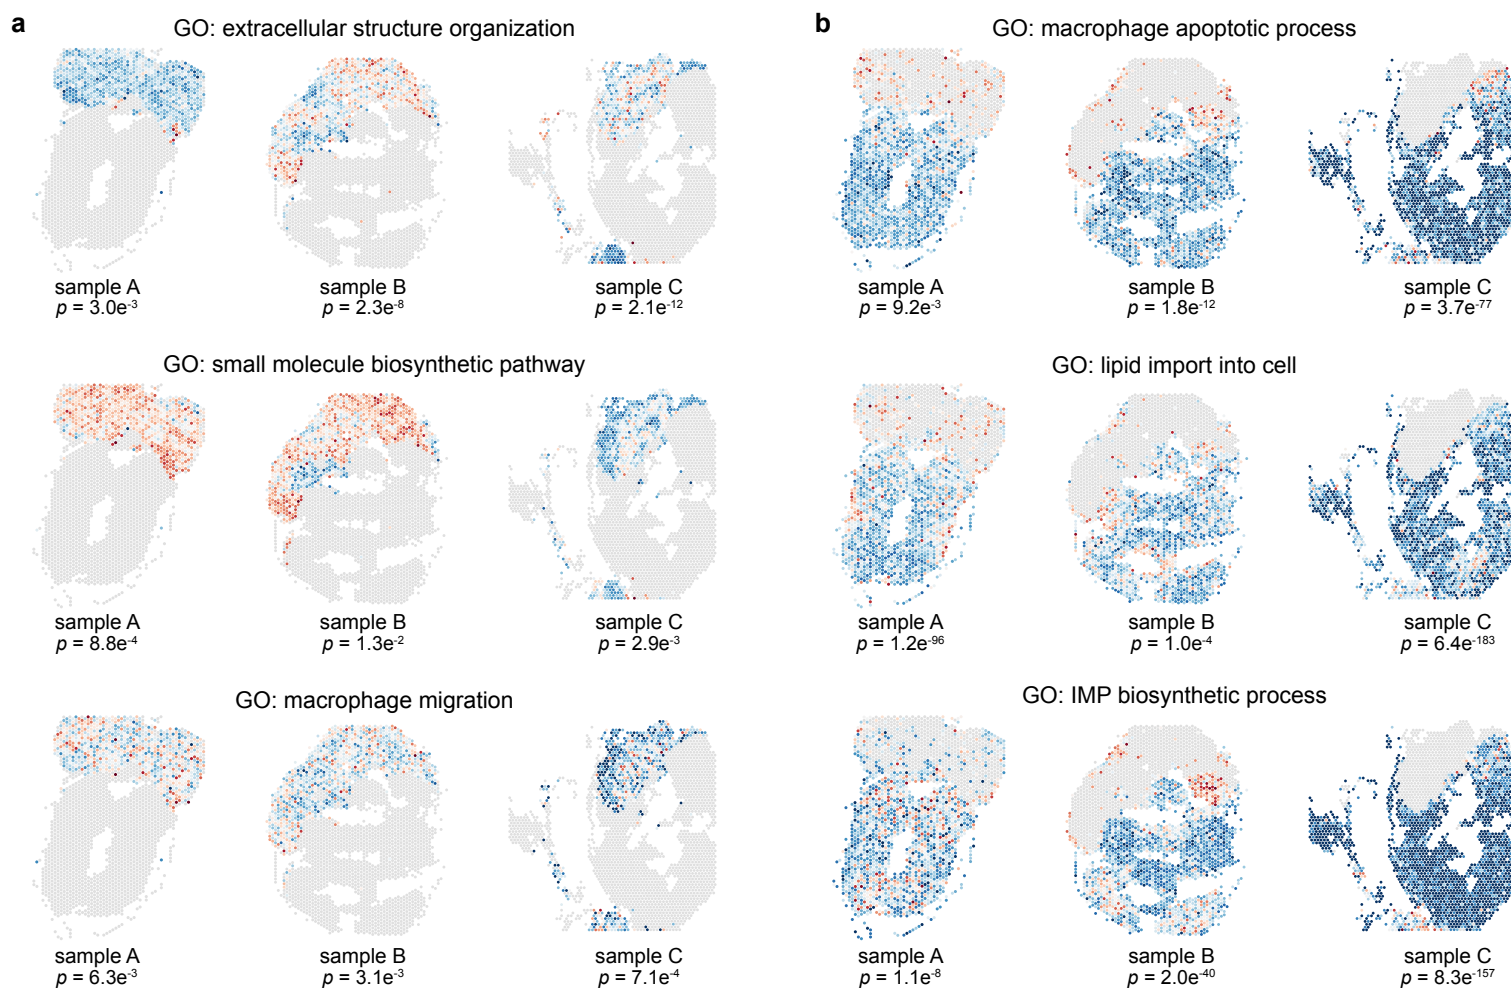

### Supplementary Figure 3. Spatial patterning of biological pathways in the tumor and microenvironment.

a-b. Average, standardized expression of annotated genes for gene ontology (GO) terms displaying spatially-coherent expression patterns in the tumor (a) and microenvironment (b) regions in each SRT sample. P-values represent the comparison between the distance between spots expressing that GO term genes and a null-distribution of distances between random spots (Wilcoxon's rank sum test, two-sided, with Bonferroni's correction).

# Supplementary Figure 4

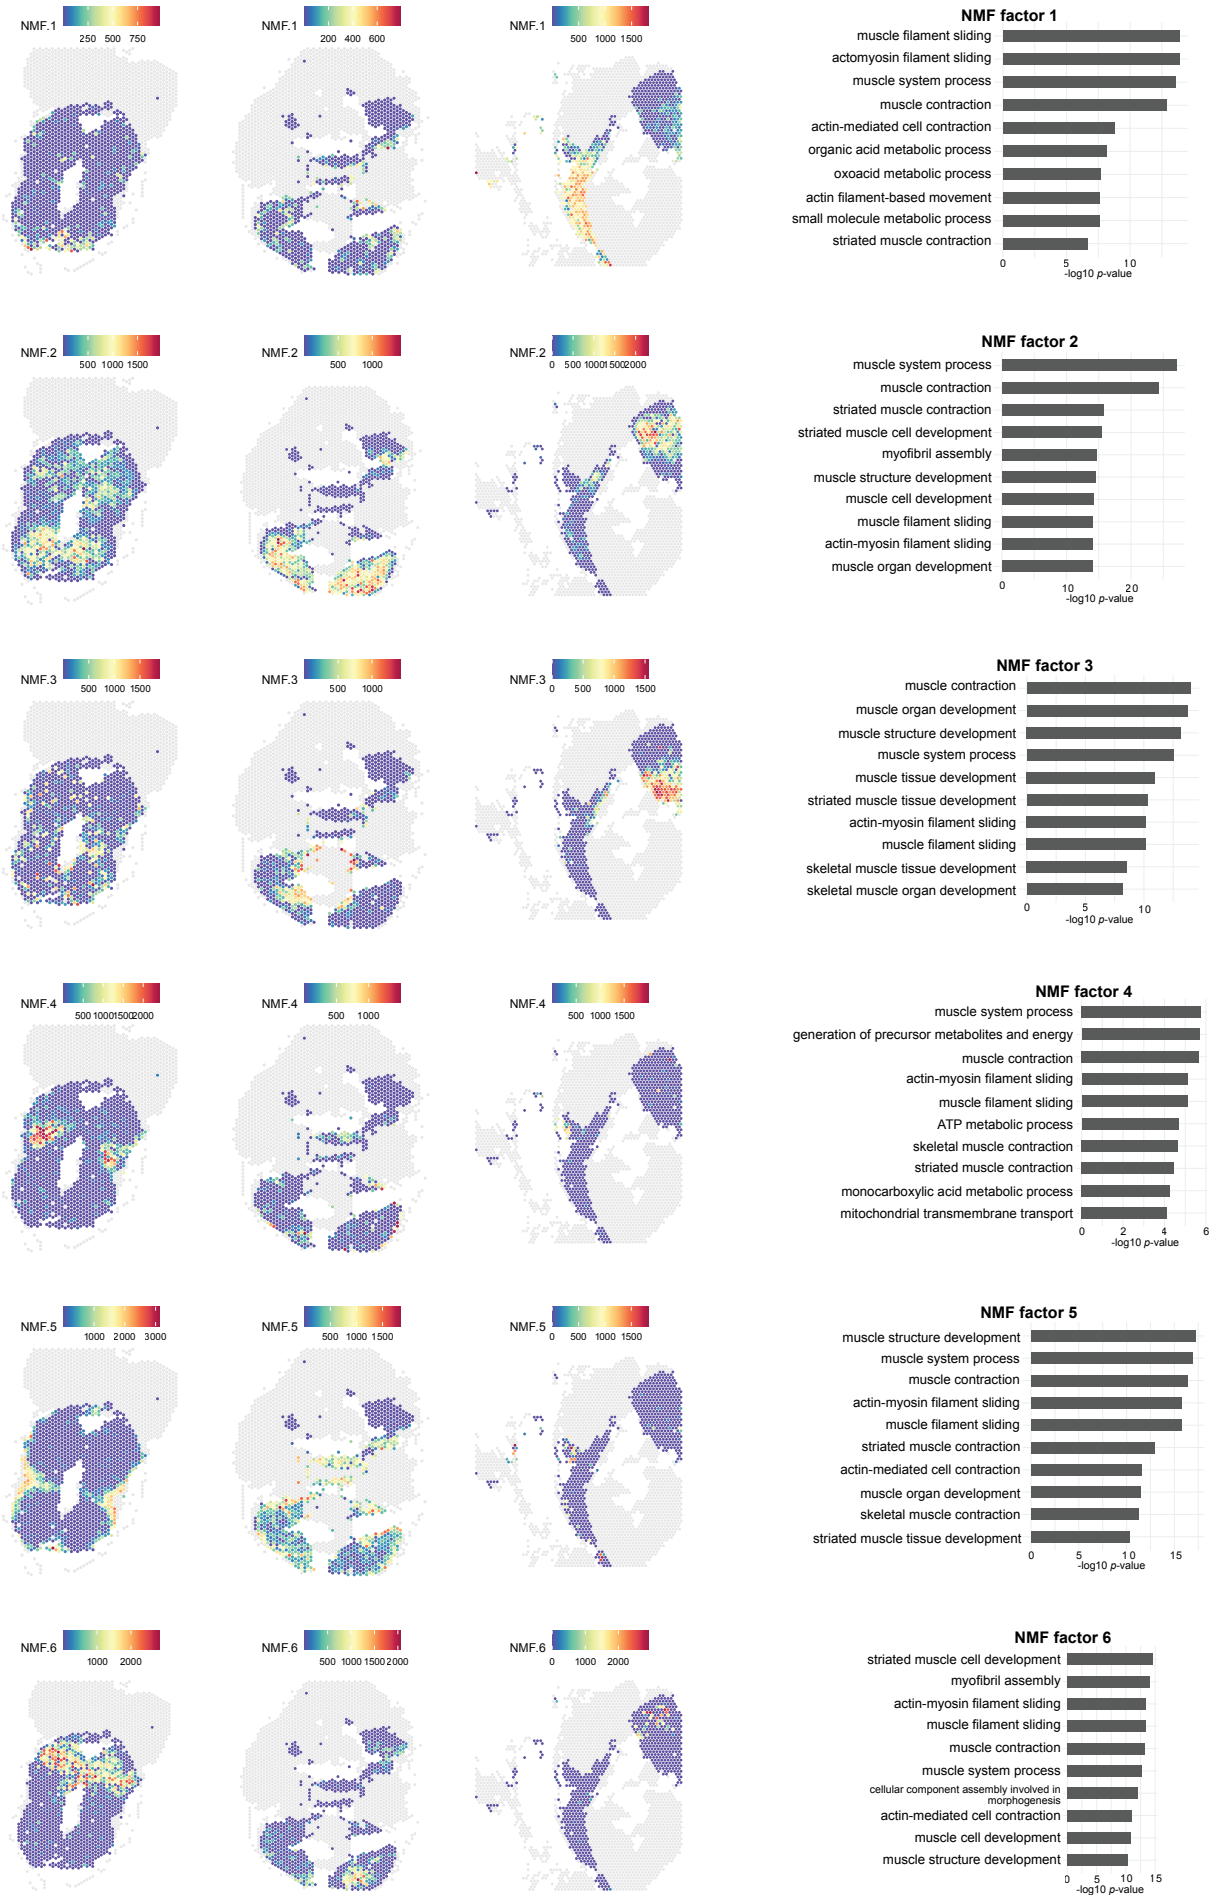

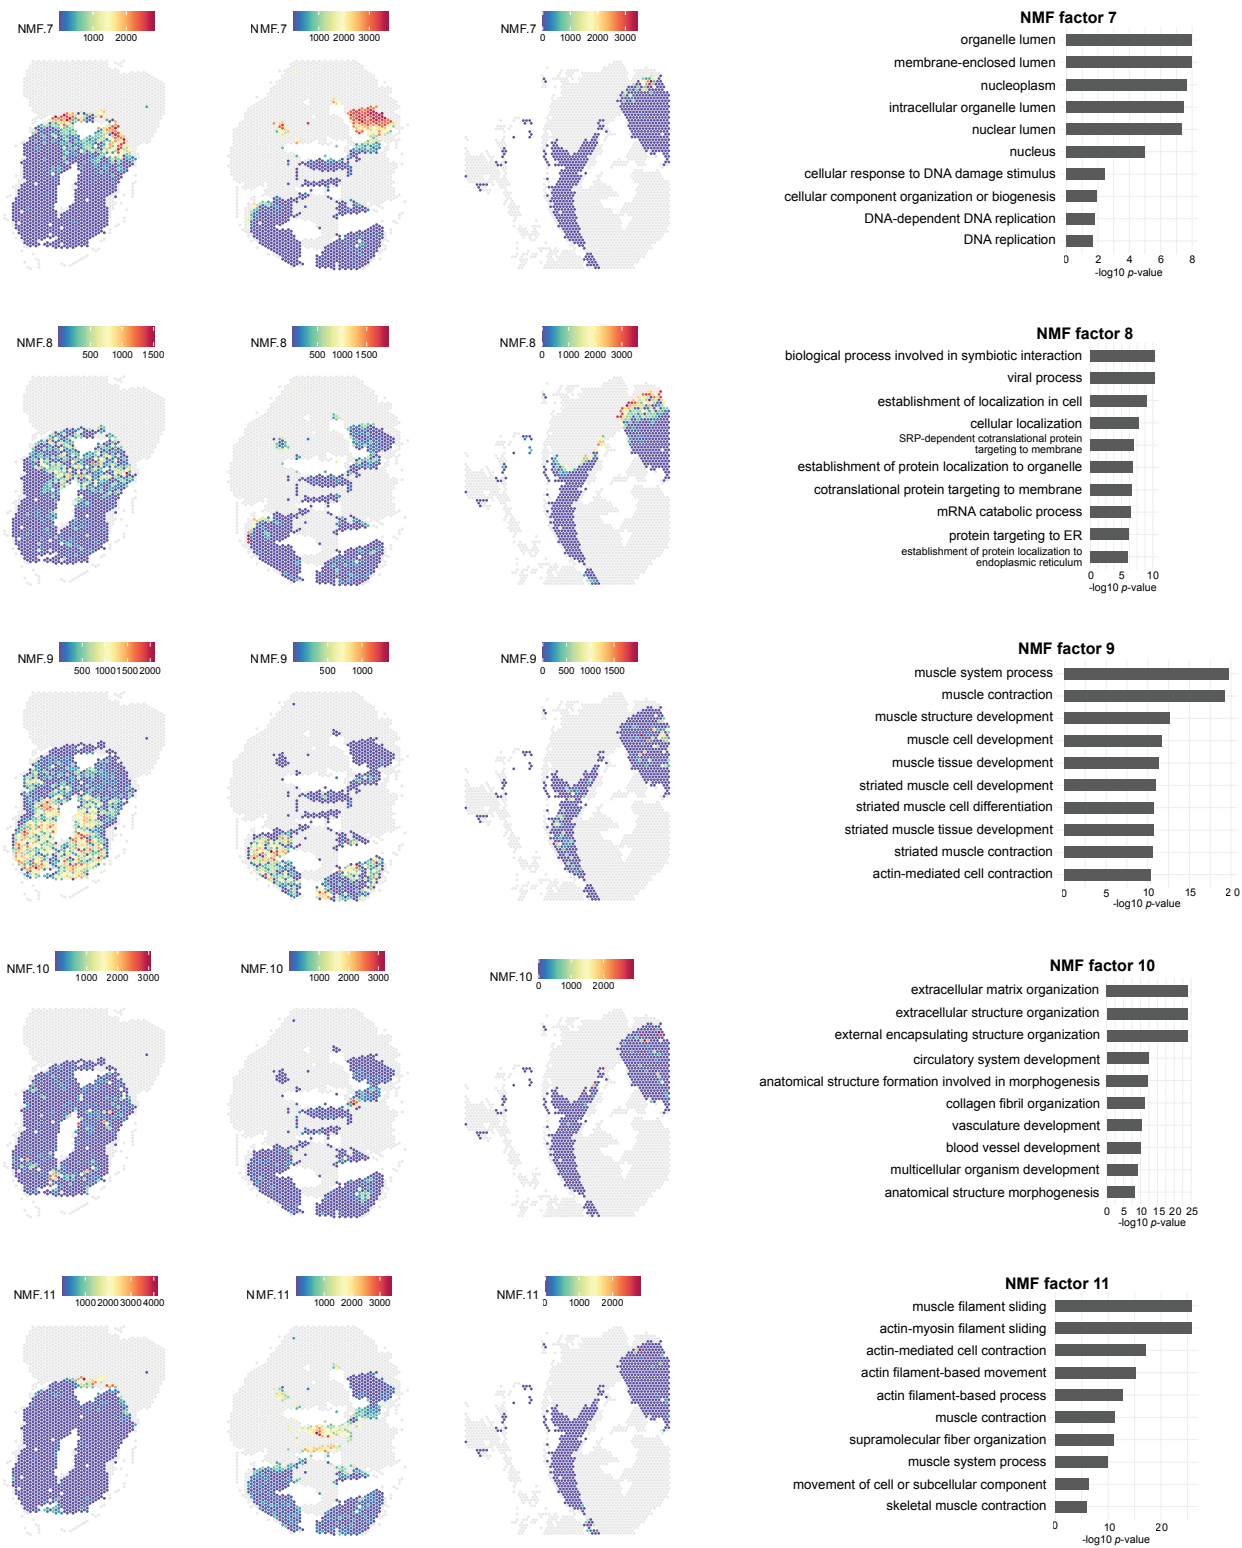

**Supplementary Figure 4. Non-negative matrix factorization (NMF) analysis on SRT spots, and enriched GO terms for top genes in each NMF factor.**

Non-negative matrix factorization (NMF) was performed on the integrated expression matrix of the three SRT samples, with  $k = 11$  factors. Factor scores were then projected onto spots, and the top 150 scoring genes per factor were used for GO enrichment analysis. P values were calculated using the hypergeometric test (one-tailed).

**Supplementary Figure 5. single-cell RNA-seq data statistics.** **a,d.** Histograms showing the number of UMIs (left) and genes (right) per cell for each scRNA-seq reaction. **b,e.** Violin plots showing the number of UMIs (left) and genes (right) per cell for the different clusters in each scRNA-seq reaction. P-values were calculated using the Wilcoxon rank sum test (two-sided) with Bonferroni's correction. **c,f.** Cluster assignments for each scRNA-seq reaction plotted in UMAP space. **g.** Predicted possible doublets within the integrated scRNA-seq dataset.



# Supplementary Figure 5

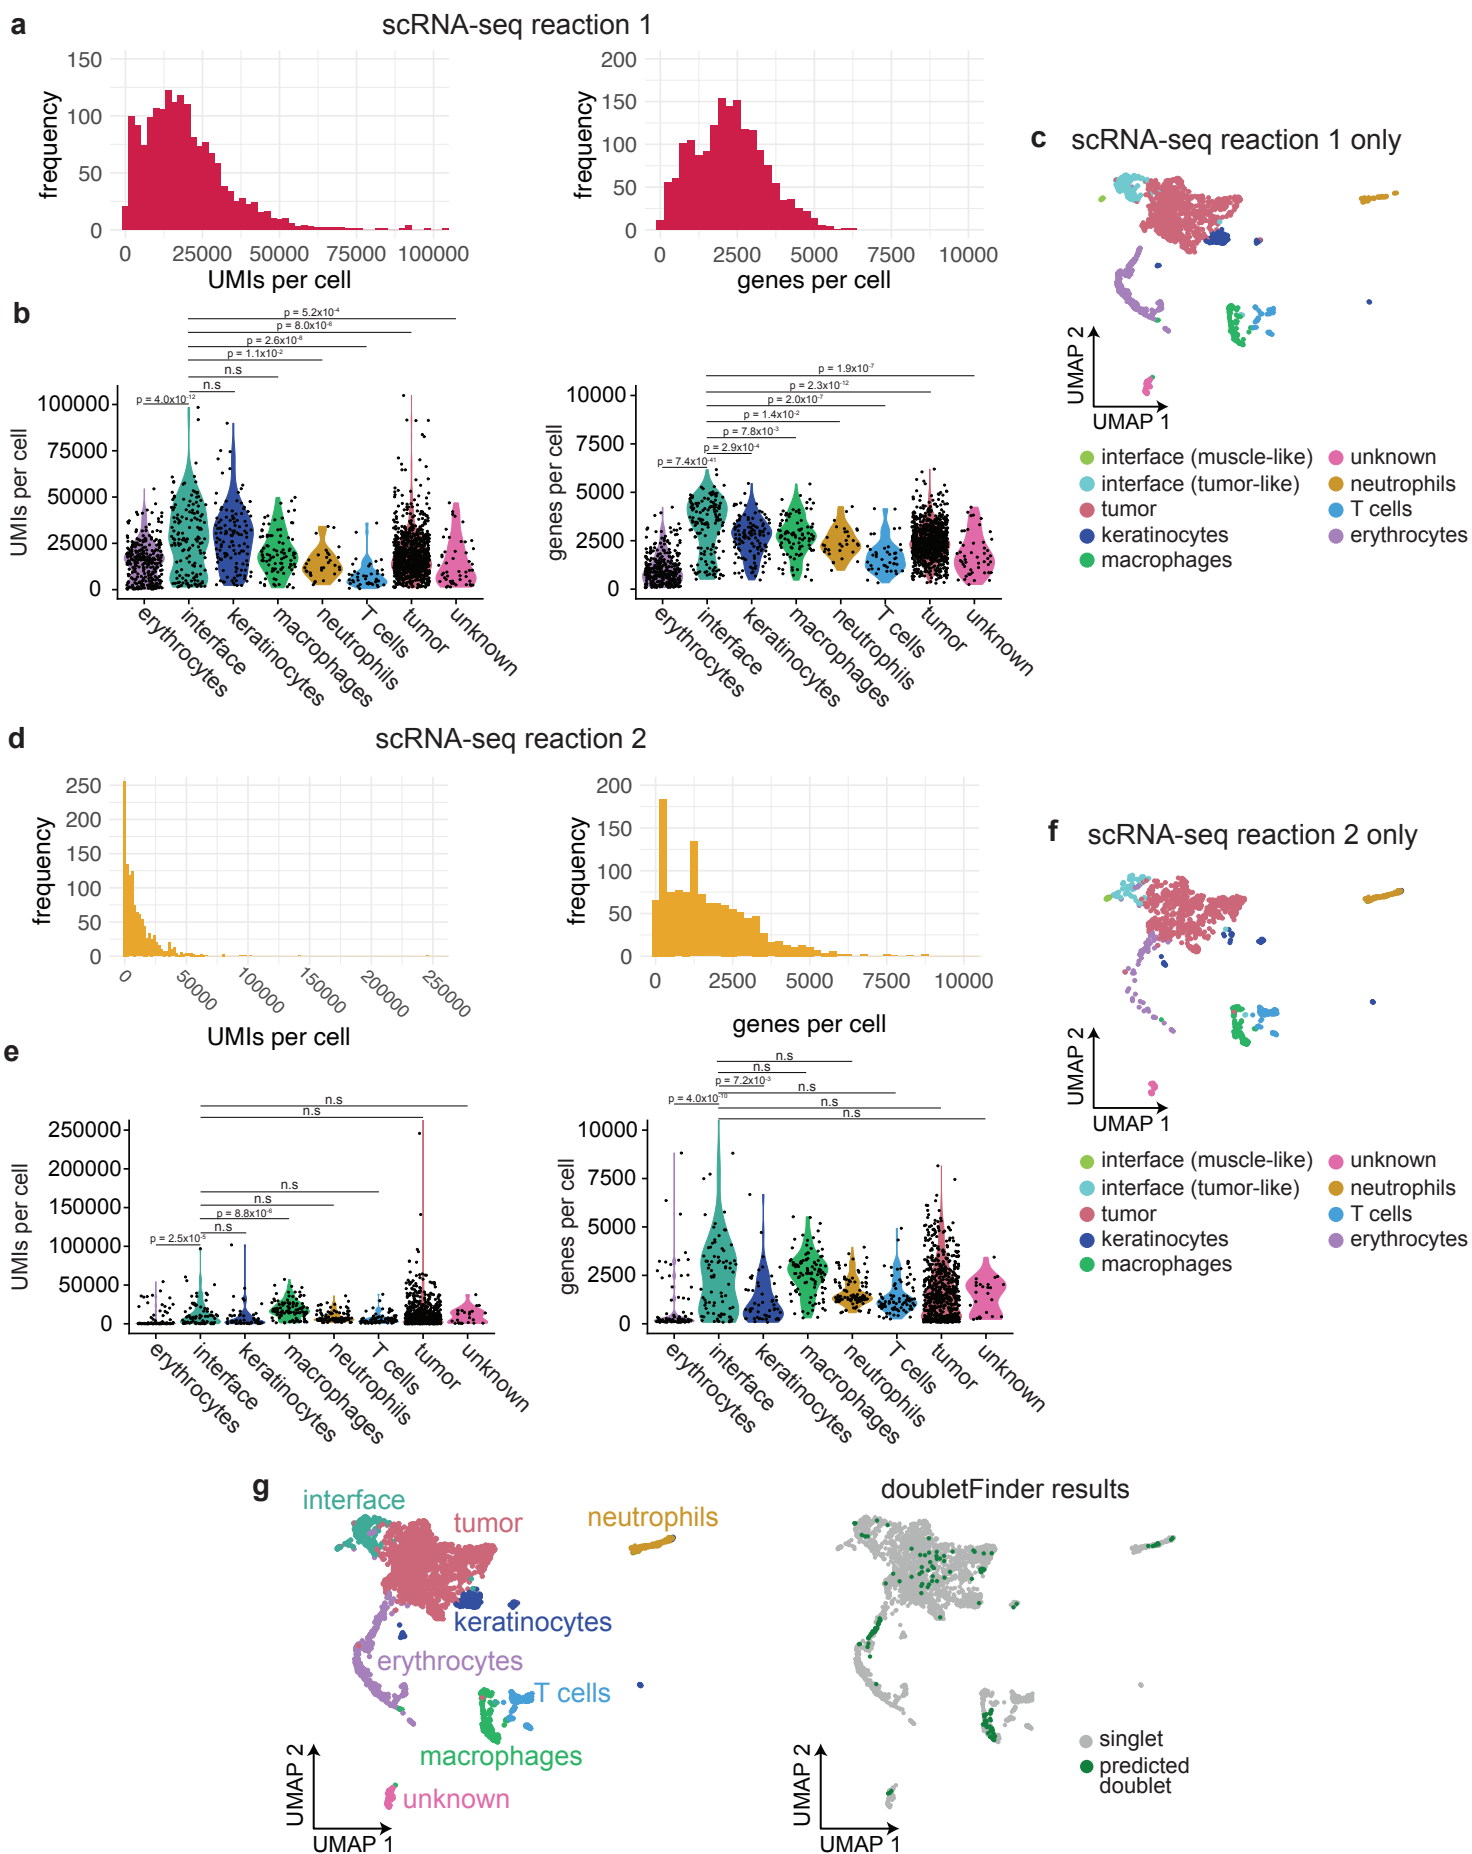

**Supplementary Figure 6. single-nucleus RNA-seq data statistics.** **a.** Histograms showing the number of UMIs (left) and genes (right) per nucleus. **b.** Violin plots showing the number of UMIs (left) and genes (right) per nucleus across the clusters in the snRNA-seq dataset. P-values were calculated using the Wilcoxon rank sum test (two-sided) with Bonferroni's correction. **c-d.** Mean expression per cell/nucleus for all common genes in the scRNA-seq and snRNA-seq dataset (15,022 genes) (c) and for the fish orthologs of the published SYSCILIA genes (320 genes).

# Supplementary Figure 6

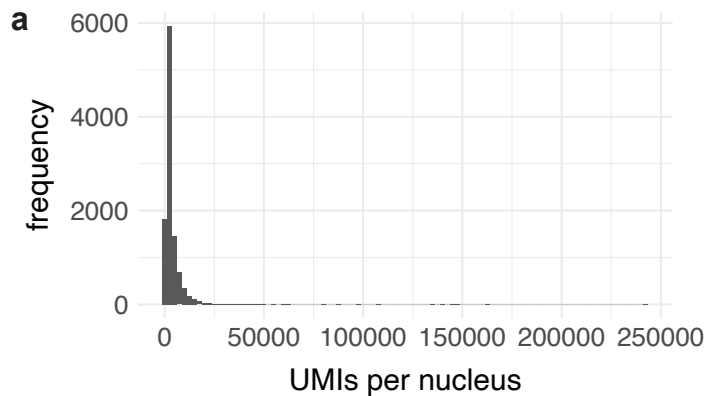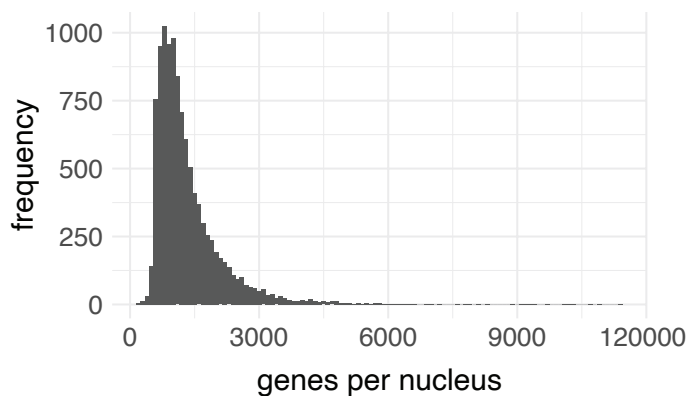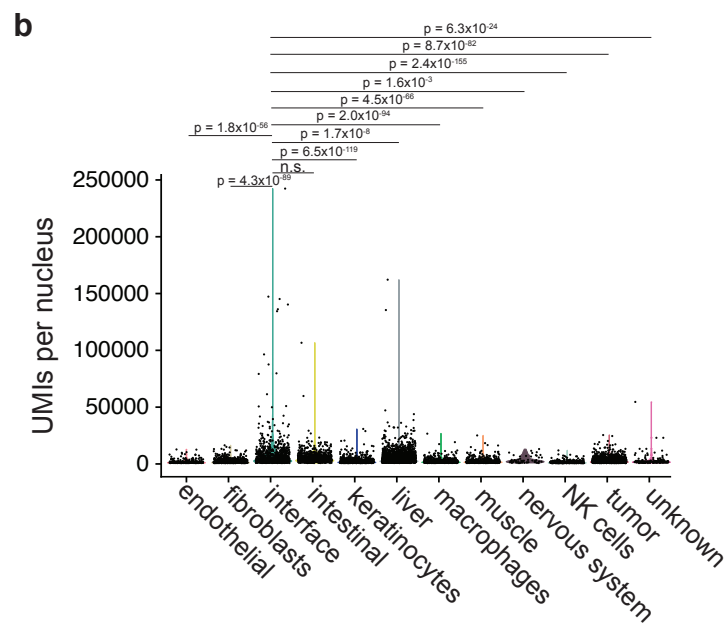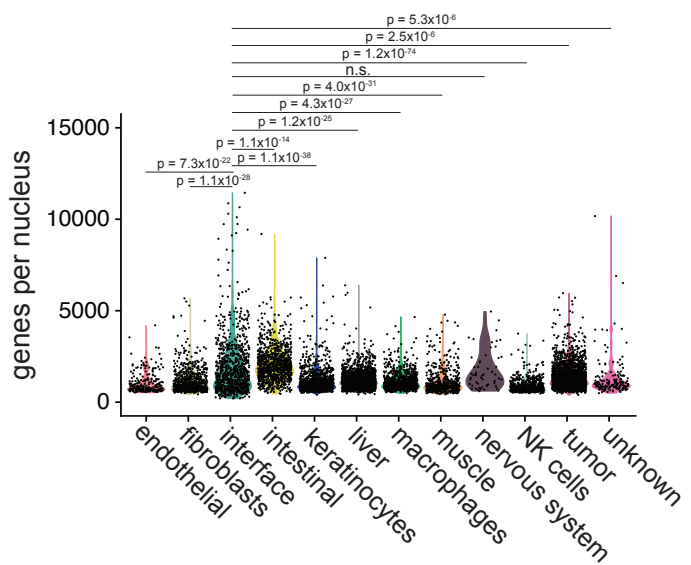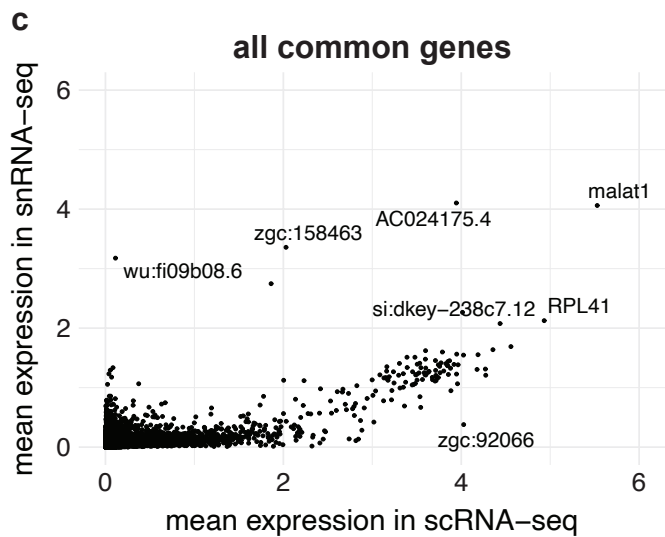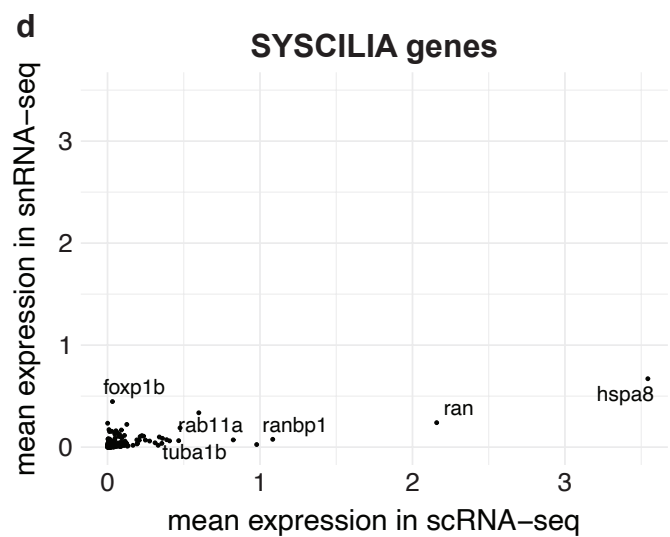

**Supplementary Figure 7. Expression of cell-type specific genes within the snRNA-seq interface cell subclusters.** (left) Overlap between genes significantly upregulated in the tumor/microenvironment cell clusters, and genes significantly upregulated in the corresponding interface subcluster. (right) Scoring of each nucleus for the proportion of genes upregulated in the tumor/microenvironment cell cluster. P-values calculated using the Wilcoxon rank sum test (two-sided).

# Supplementary Figure 7

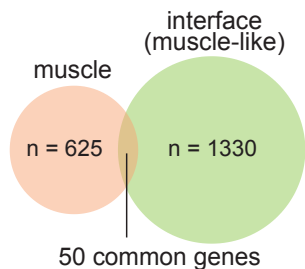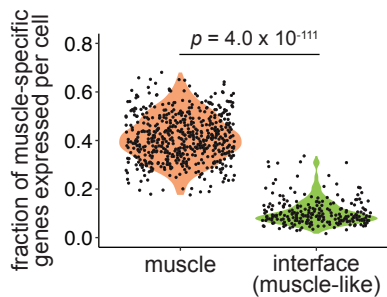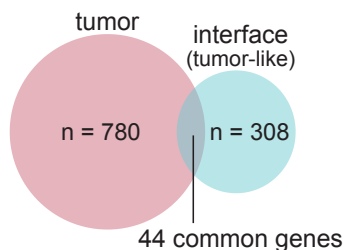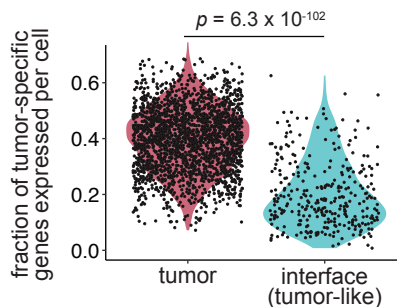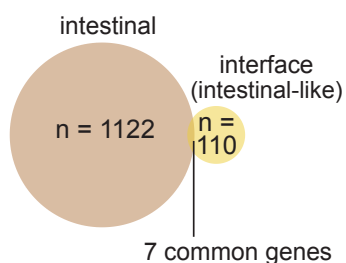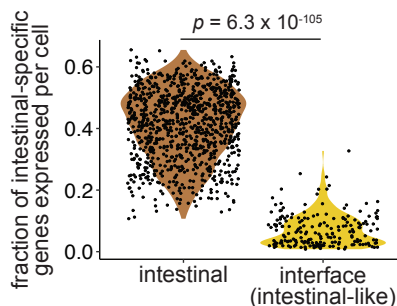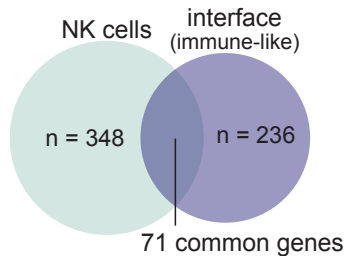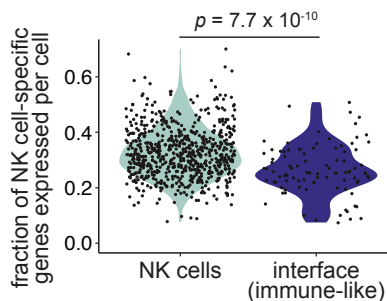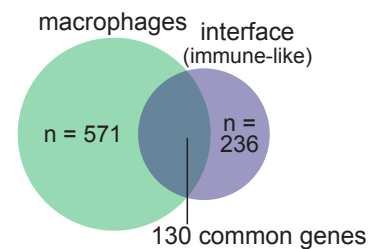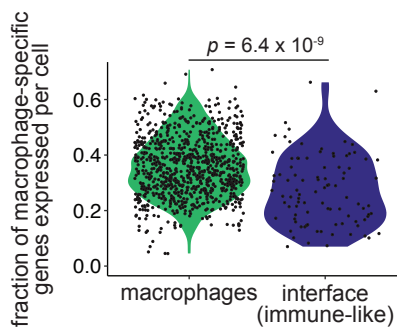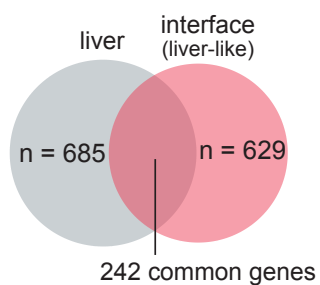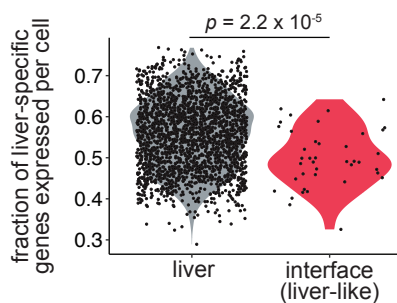

**Supplementary Figure 8. Expression of cell-type specific genes from tumor, microenvironment and related interface clusters.** Clusters are labelled on the top colorbar and marker genes are labelled on the left and right axes. Scaled (Z-scored) expression is shown.

# Supplementary Figure 8

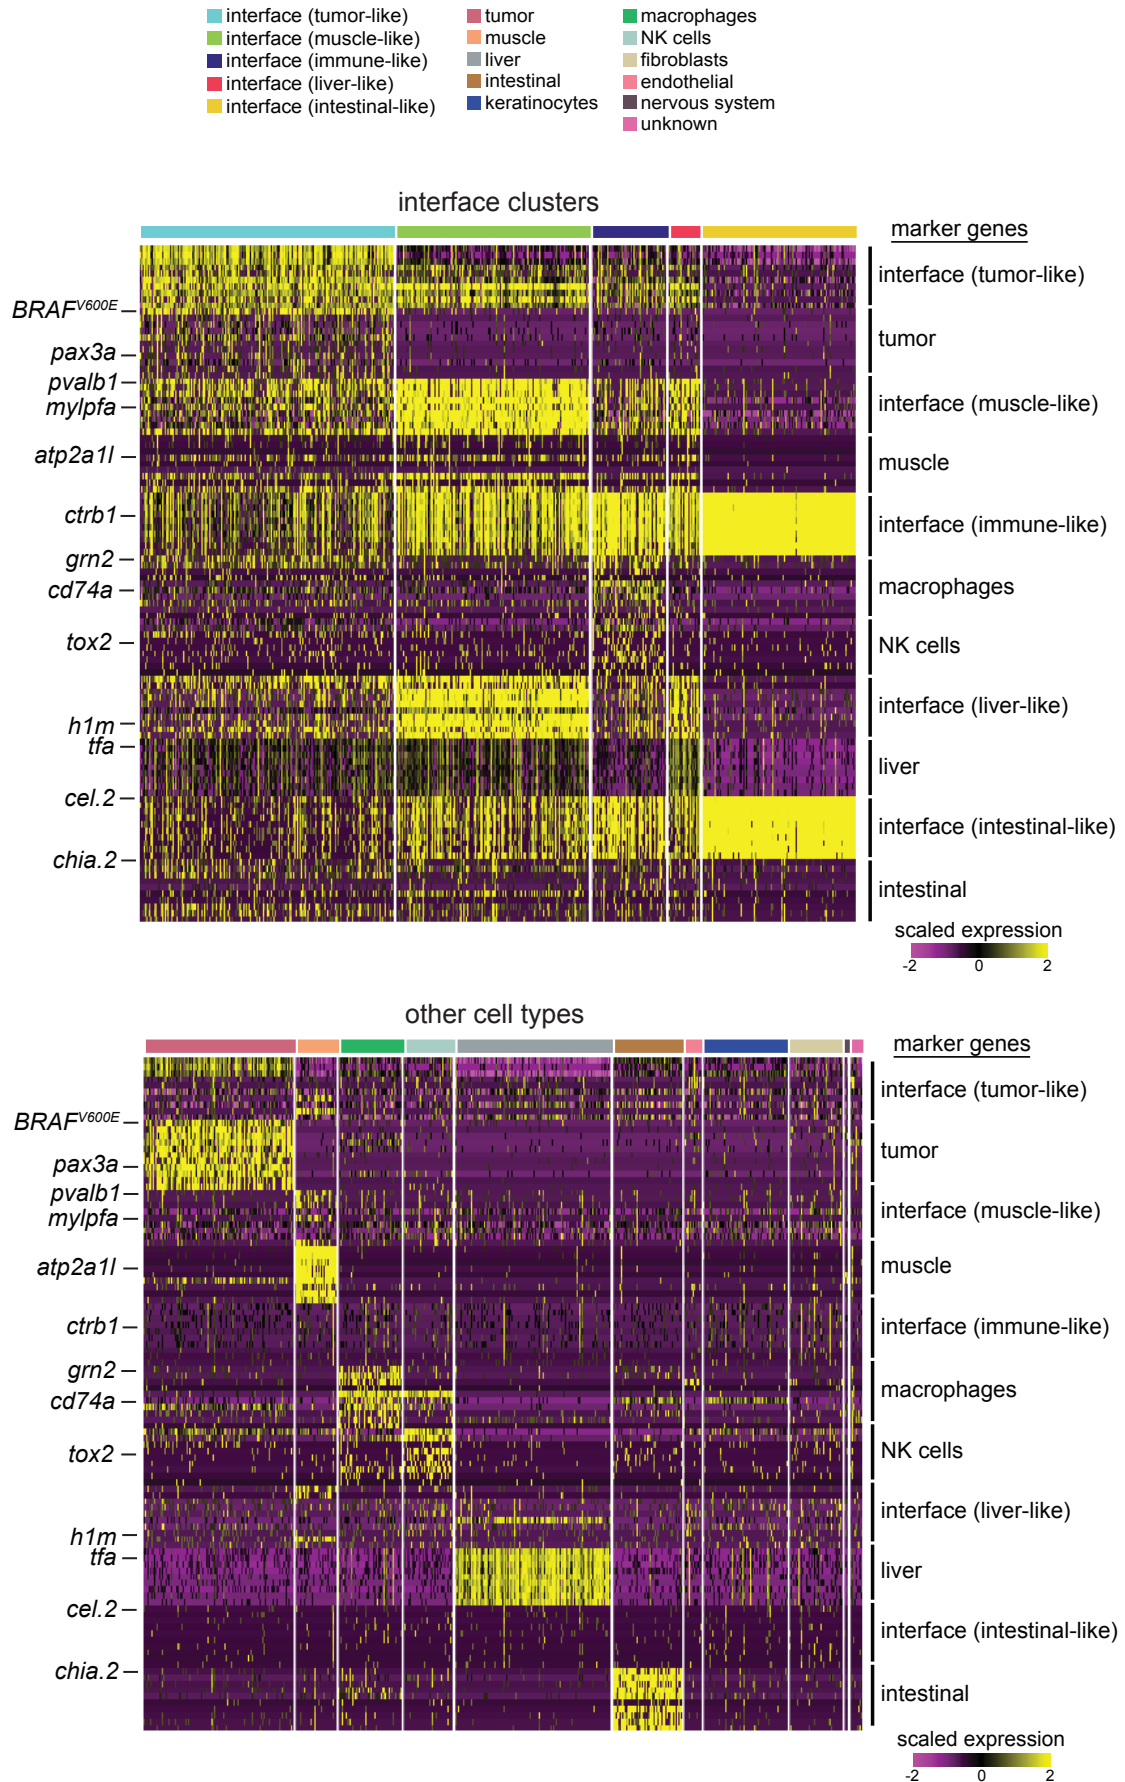

# Supplementary Figure 9

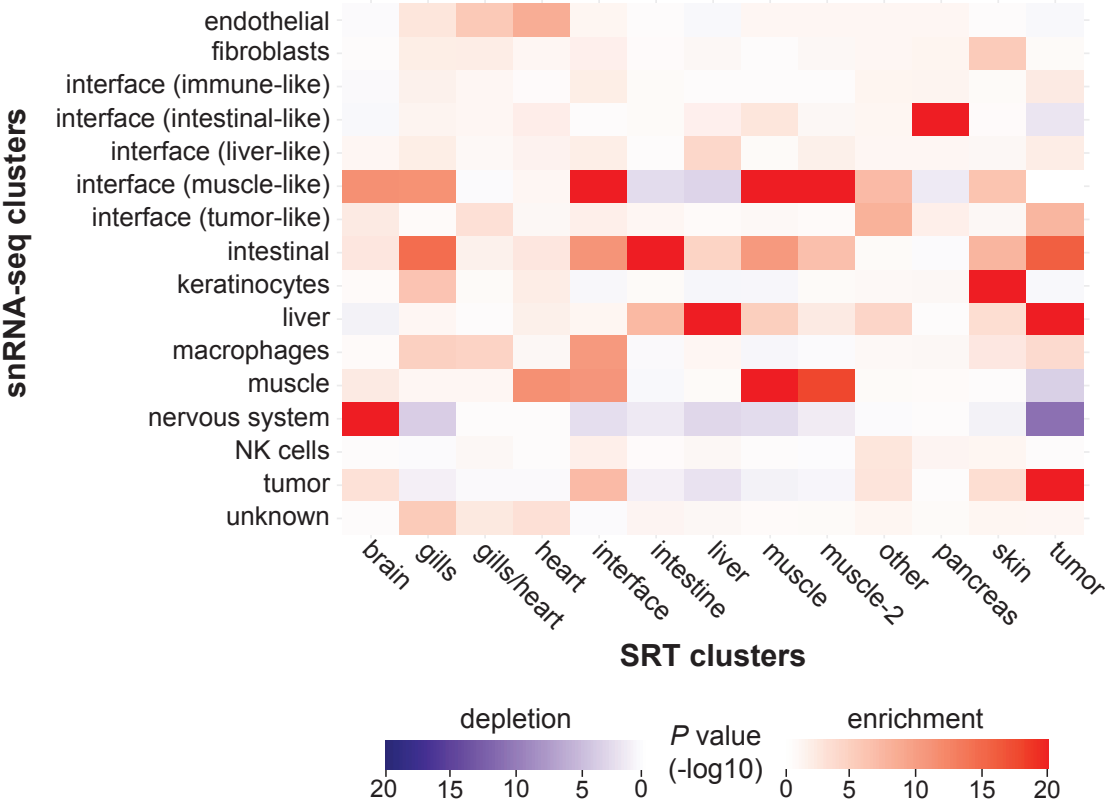

**Supplementary Figure 9. Deconvolution of the SRT interface region using multimodal intersection analysis (MIA).** MIA map for all snRNA-seq clusters compared to all SRT clusters. P-values were calculated using the hypergeometric test (one-tailed).



**Supplementary Figure 10. Computational modeling of interface cell interactions with NicheNet.** **a.** Predicted ligands expressed by interface cells, ranked by predicted ligand activity (Pearson correlation coefficient). **b.** Predicted receptors expressed by non-interface cells for the predicted ligands in **a.** **c.** Predicted target genes for the ligands in **a.** **d-e.** Normalized expression of the zebrafish orthologs of *HMGB2* (*hmgb2a* and *hmgb2b*) and *CDH1* (*cdh1*) in the snRNA-seq, scRNA-seq and SRT clusters.

# Supplementary Figure 10

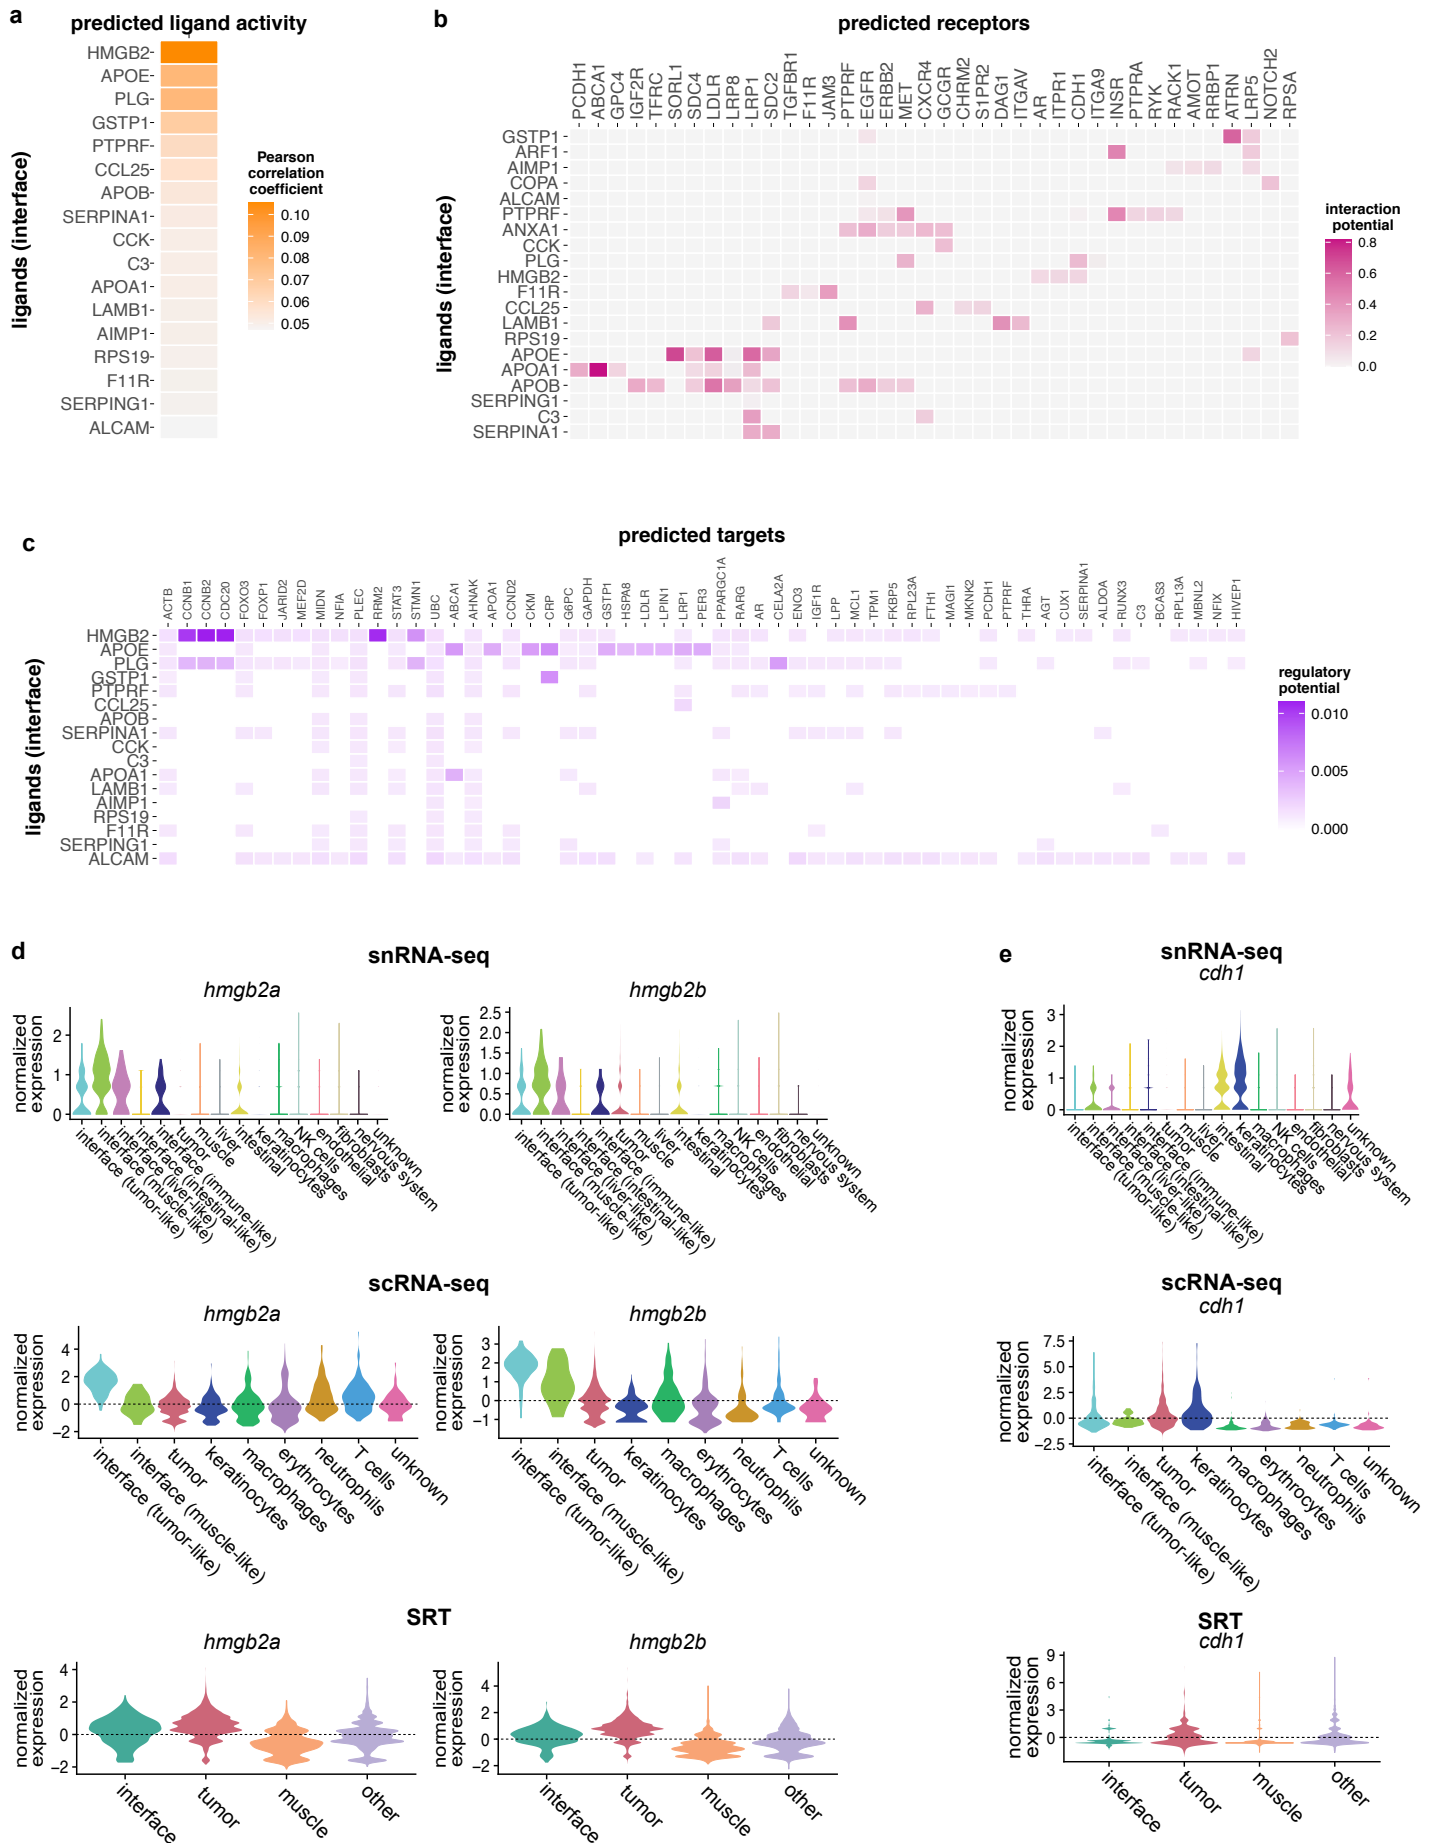

**Supplementary Figure 11. A common interface gene signature shared between the scRNA-seq, snRNA-seq, and SRT datasets.** Heatmaps showing expression of the common genes upregulated in the scRNA-seq, snRNA-seq, and SRT interface clusters. Full genelist can be found in **Table S2**. Genes are plotted in the same order across all three heatmaps.

# Supplementary Figure 11

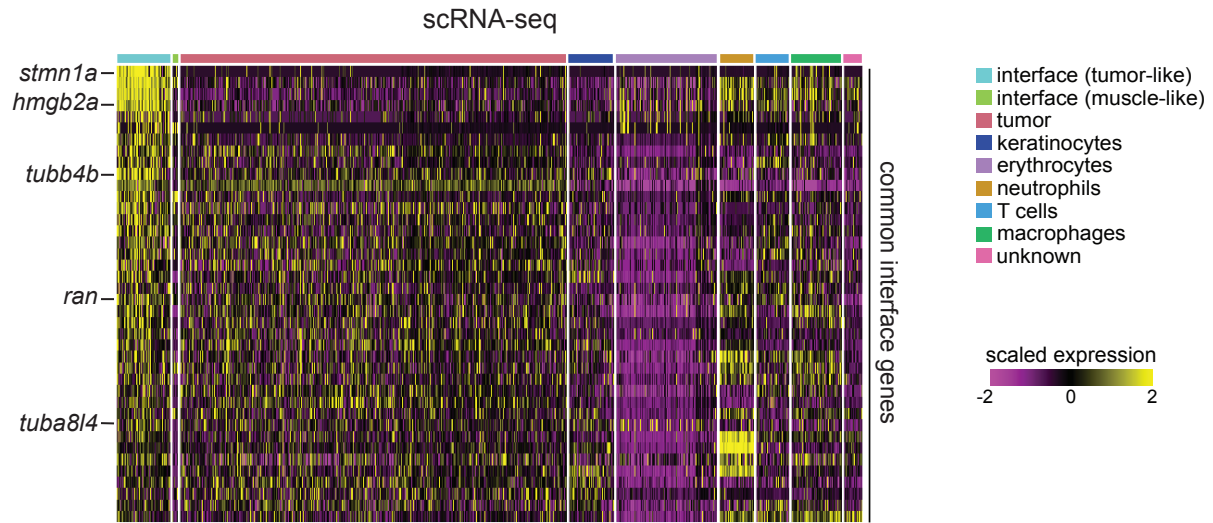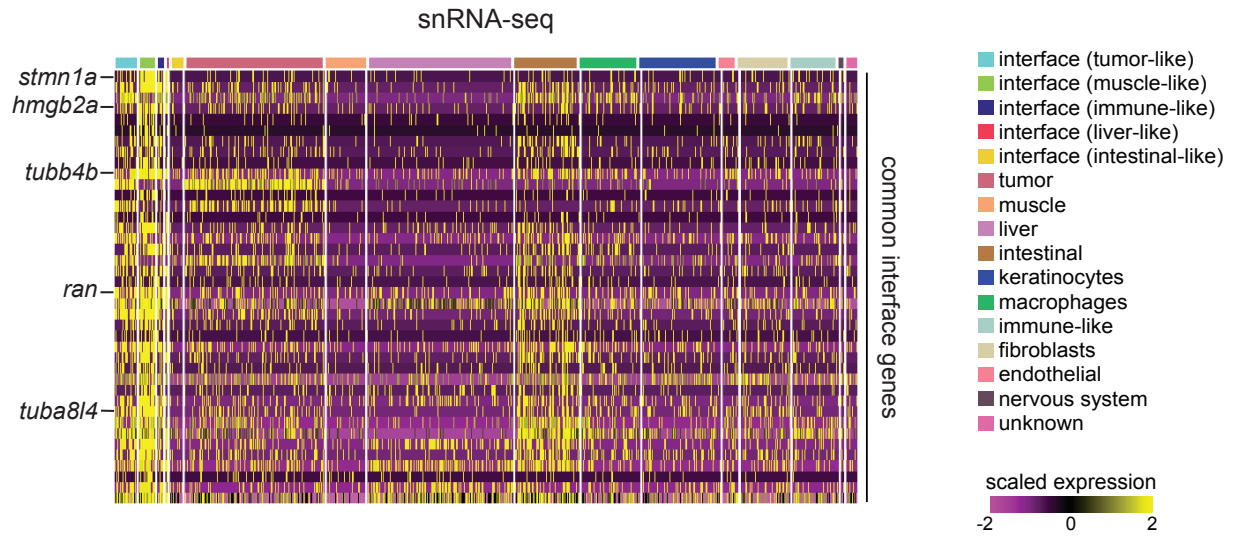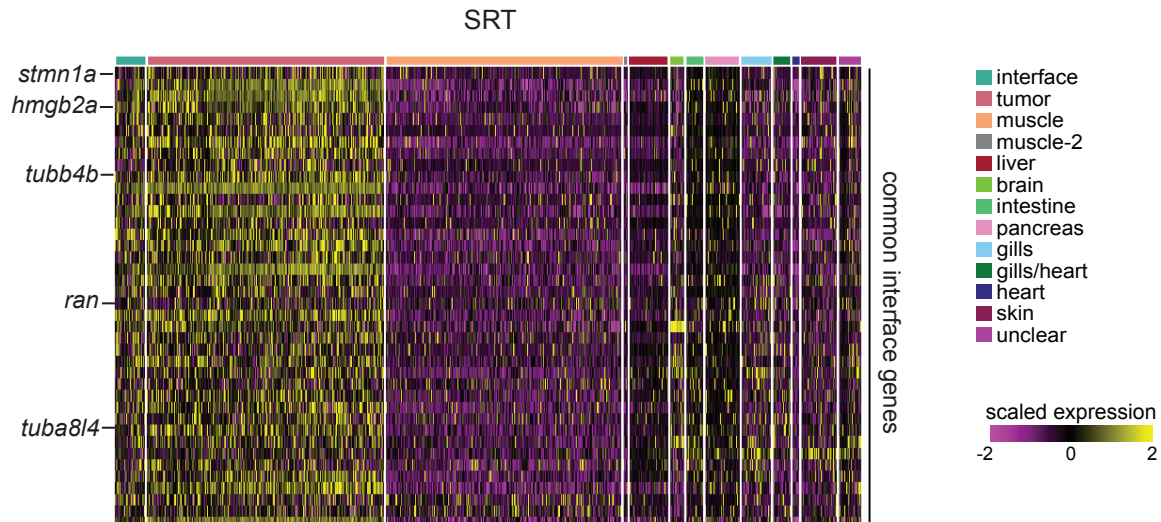

**Supplementary Figure 12. Acetylated tubulin staining within the tumor, muscle, and tumor-muscle interface regions.** Immunofluorescence images of tumor (green), Hoescht (blue) and acetylated tubulin (magenta) intensity at the tumor-muscle interface (top), center of tumor (middle) and distant muscle (bottom). Scale bars, 100  $\mu\text{m}$  (40X magnification). Representative images are shown from  $n = 3$  independent experiments.

# Supplementary Figure 12

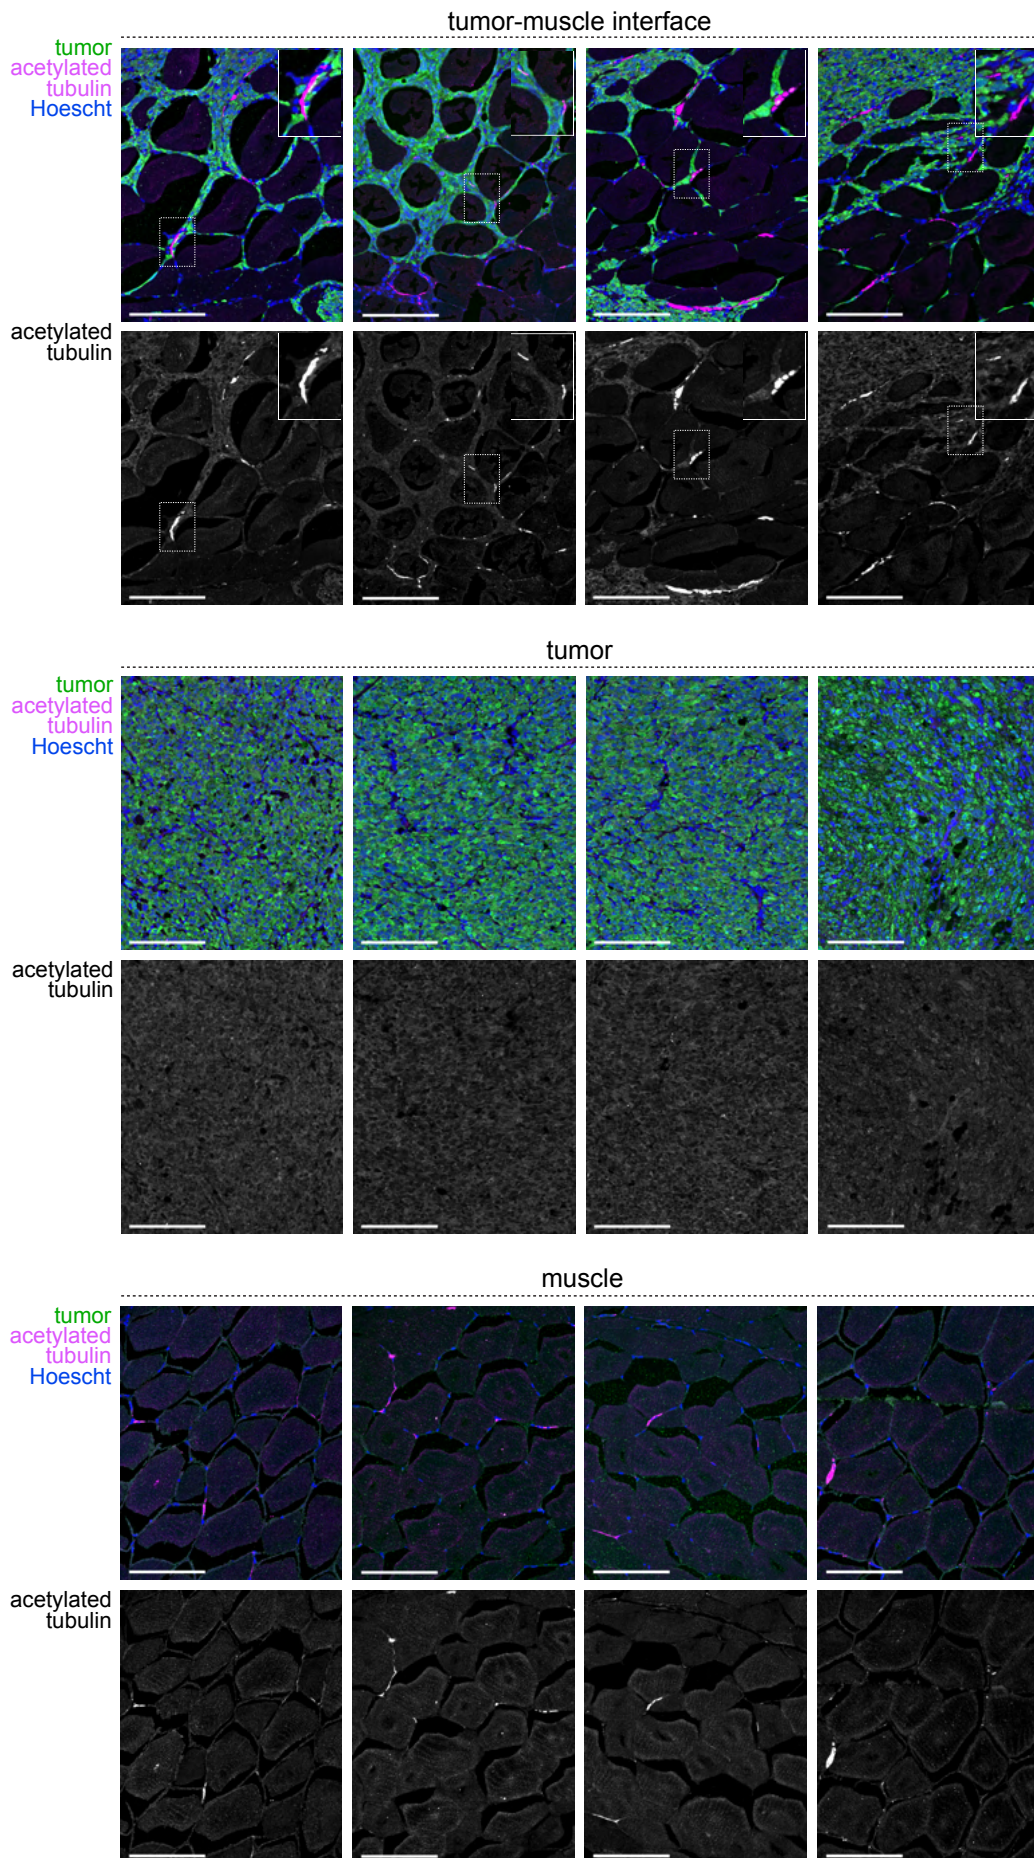

## Supplementary Figure 13

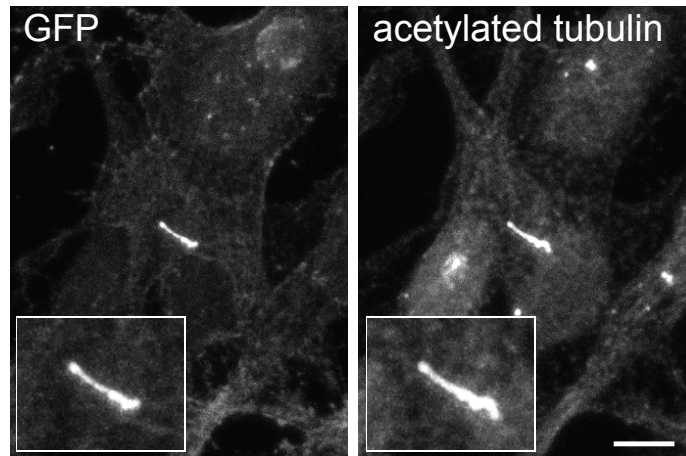

**Supplementary Figure 13. Cilia are occasionally present on cultured zebrafish melanoma cells.**

Staining of cultured ZMEL1 cells expressing a transgenic cilia reporter (ARL13B-GFP), stained for GFP (left) and the cilia marker acetylated tubulin (right). Scale bar, 5  $\mu$ m. Representative images are shown from n = 3 independent experiments.

**Supplementary Figure 14. An interface-like cell state may be present in human melanoma.** **a-c.** UMAP projection of human metastatic melanoma scRNA-seq data from Smalley et al., 2021. Cluster assignments (a), interface marker gene expression score (b), and interface classification (c) are indicated. The cutoff for classification as an interface-like cell state is indicated in (b). **d.** Interface gene expression scores across the different clusters in the dataset. **e.** Normalized expression of the interface-specific genes *PLK1*, *HMGB2*, *TUBB4B*, and *TPX2*. **f.** SYSCILIA gene expression score across the 3 main interface cell states relative to the corresponding tumor/TME cell type. **d,f.** *p*-values were calculated using the Wilcoxon rank sum test (two-sided) with Bonferroni's correction as needed. **g.** Heatmap displaying scaled expression of interface, tumor, T/NK cell, and myeloid marker genes across all cells.



# Supplementary Figure 14

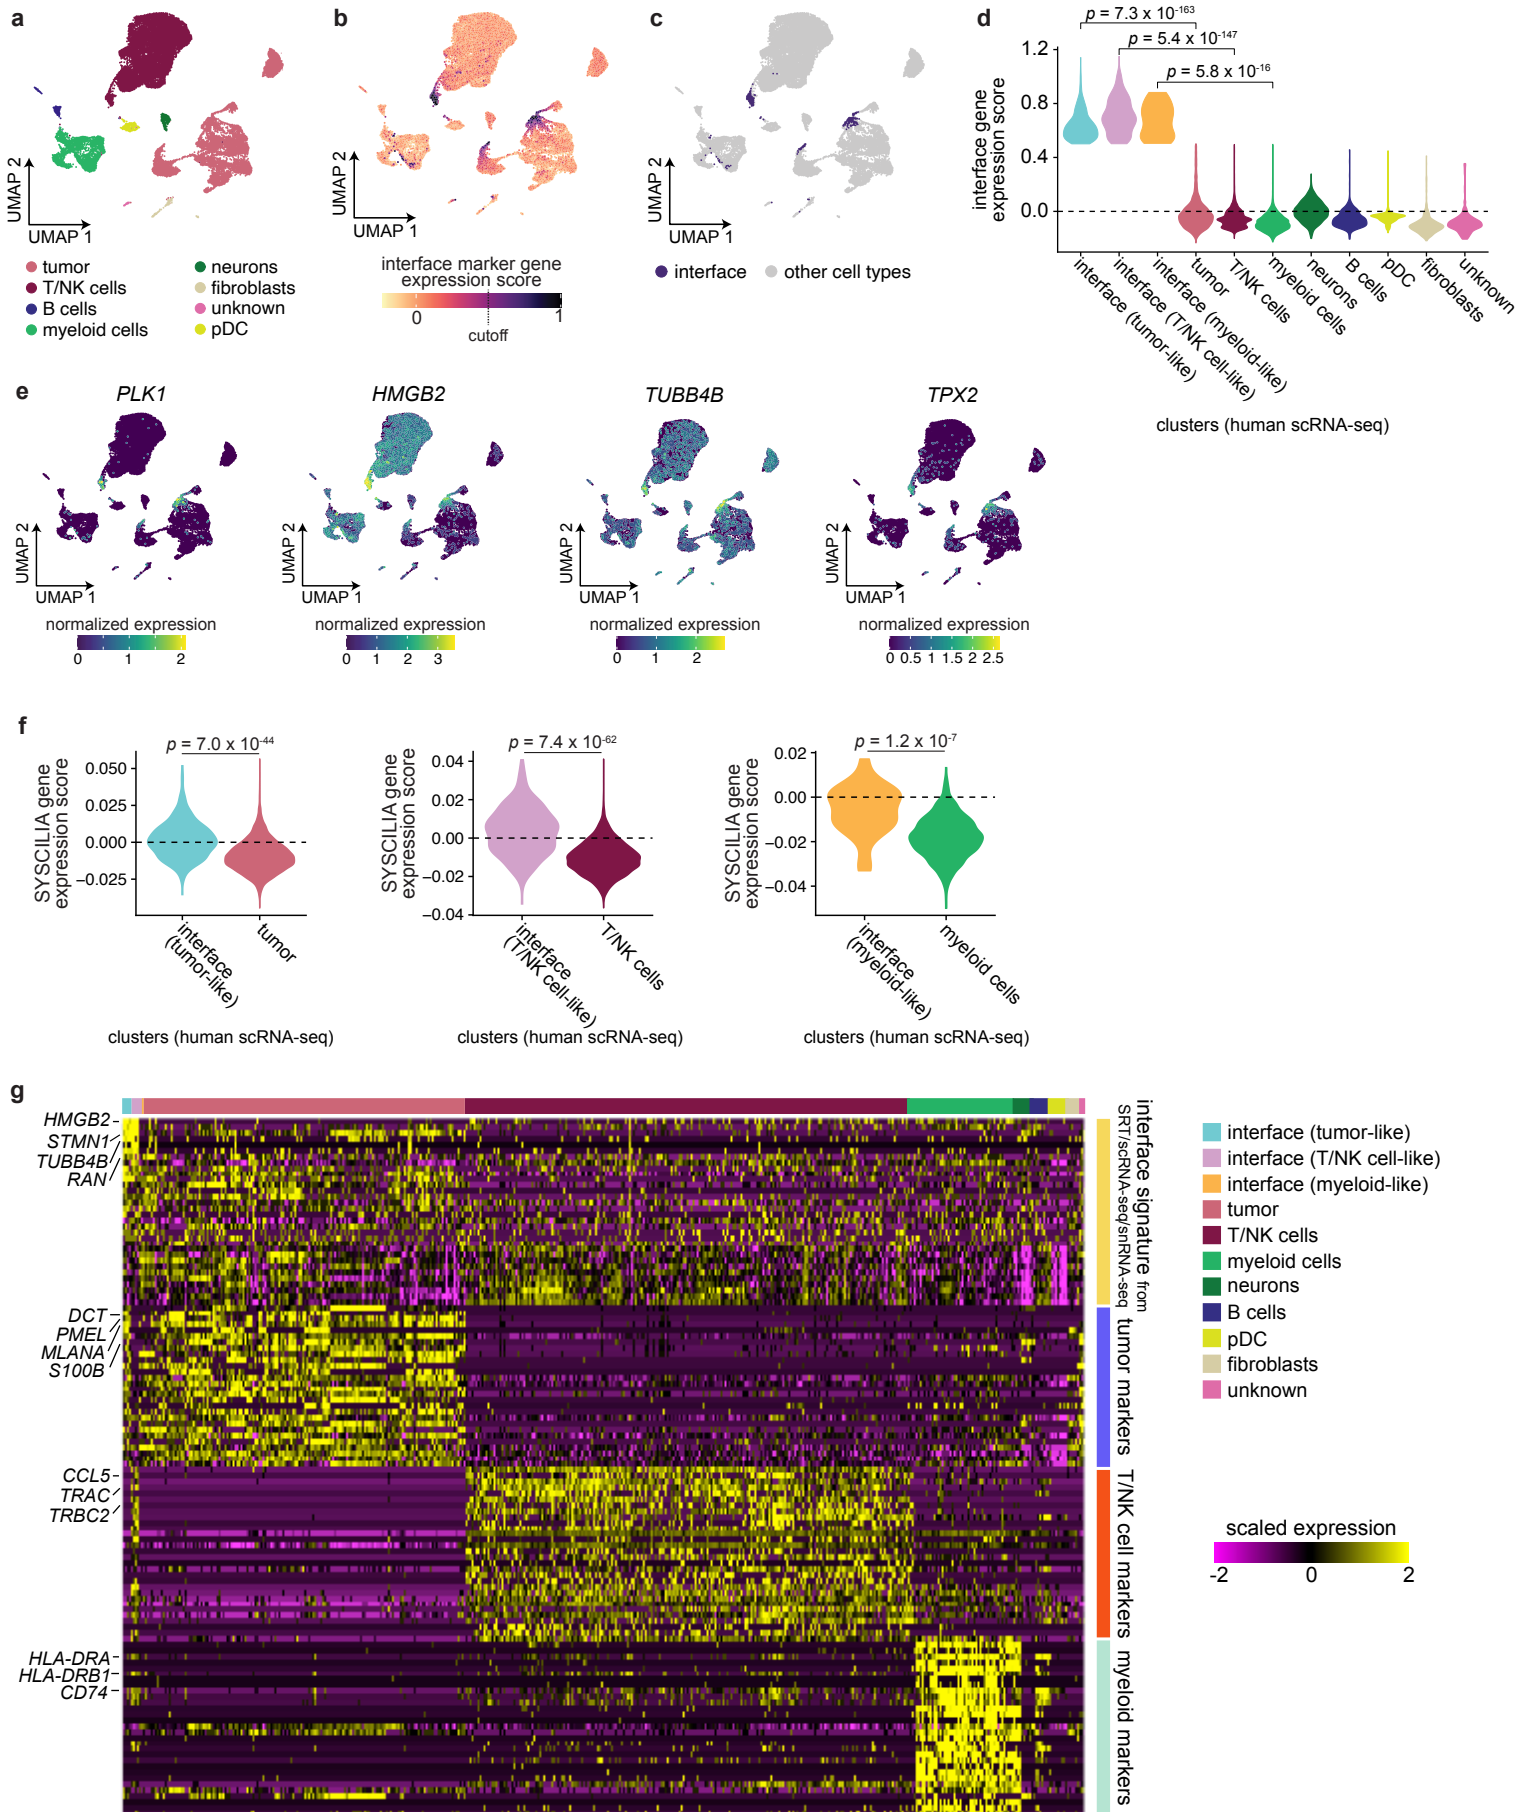

## Supplementary Table 1

Common interface gene signature across the SRT, scRNA-seq and snRNA-seq datasets. Genes were calculated using the Wilcoxon rank sum test (two-sided).

| <b>common interface genes</b> |
|-------------------------------|
| stmn1a                        |
| h2afvb                        |
| hmgn2                         |
| hmgb2a                        |
| pcna                          |
| rrm2                          |
| hmga1a                        |
| snrpd1                        |
| nutf2l                        |
| tubb4b                        |
| BRAFhuman                     |
| sumo3a                        |
| zgc:123068                    |
| snrpe                         |
| hint1                         |
| cirbpa                        |
| snrpb                         |
| zgc:152791                    |
| fkbp1aa                       |
| snrpd2                        |
| ran                           |
| ppiab                         |
| ckbb                          |
| psmb6                         |
| cst14a.2                      |
| zgc:56493                     |
| cox6a1                        |
| psma1                         |
| khdrbs1a                      |
| hspe1                         |
| dad1                          |
| tuba8l4                       |
| cf11                          |
| actb1                         |
| gstp1                         |
| zgc:153867                    |
| mibp2                         |
| si:dkey-188i13.11             |
| eif3f                         |
| ppiaa                         |

## Supplementary Table 2

Activator/repressor status for the human ETS genes. Activator/repressor status and fish ortholog(s) were obtained from Uniprot and ZFIN.

| Human gene   | Fish ortholog(s)<br>(Source: ZFIN) | Activator or repressor?<br>(Source: Uniprot) |
|--------------|------------------------------------|----------------------------------------------|
| <i>ERF</i>   | <i>erf, erf1, erf3</i>             | Repressor                                    |
| <i>ELK1</i>  | <i>elk1</i>                        | Activator                                    |
| <i>ELK3</i>  | <i>elk3</i>                        | Either                                       |
| <i>ELK4</i>  | <i>elk4</i>                        | Either                                       |
| <i>ERG</i>   | <i>erg</i>                         | Unknown                                      |
| <i>FLI1</i>  | <i>fli1, fli1rs</i>                | Activator                                    |
| <i>FEV</i>   | <i>fev</i>                         | Repressor                                    |
| <i>ETS1</i>  | <i>ets1</i>                        | Activator                                    |
| <i>ETS2</i>  | <i>ets2</i>                        | Activator                                    |
| <i>ETV2</i>  | <i>etsrp</i>                       | Activator                                    |
| <i>GABPA</i> | <i>gabpa</i>                       | Activator                                    |
| <i>ETV5</i>  | <i>etv5a, etv5b</i>                | Activator                                    |
| <i>ETV1</i>  | <i>etv1</i>                        | Activator                                    |
| <i>ETV4</i>  | <i>etv4</i>                        | Activator                                    |
| <i>SPDEF</i> | <i>spdef</i>                       | Activator                                    |
| <i>EHF</i>   | <i>ehf</i>                         | Either                                       |
| <i>ELF3</i>  | <i>elf3</i>                        | Either                                       |
| <i>ELF4</i>  | <i>elf1</i>                        | Activator                                    |
| <i>ELF2</i>  | <i>elf2a, elf2b</i>                | Either                                       |
| <i>ETV6</i>  | <i>etv6</i>                        | Repressor                                    |
| <i>ETV7</i>  | <i>etv7</i>                        | Repressor                                    |
| <i>SPI1</i>  | <i>spi1b</i>                       | Activator                                    |
| <i>SPIC</i>  | <i>spic, spic1</i>                 | Activator                                    |

### Supplementary Table 3

List of primers used in this study

| <b>Primer name</b> | <b>Sequence (5'-3')</b>                 |
|--------------------|-----------------------------------------|
| MH027              | GCCGCCCCCTTCACCATGTTTCAGTCTGATGG        |
| MH028              | gcccttgctcaccaTGAGATCGTGTCCCTGAGCATCACC |
| MH029              | atggtgagcaagggcgag                      |
| MH030              | GGTGAAGGGGGCGGC                         |
